# Supplementary material
Source: MDPI journal article supplement (https://www.mdpi.com/2073-4441/10/8/1039)
Supplement: s1 [file s1]

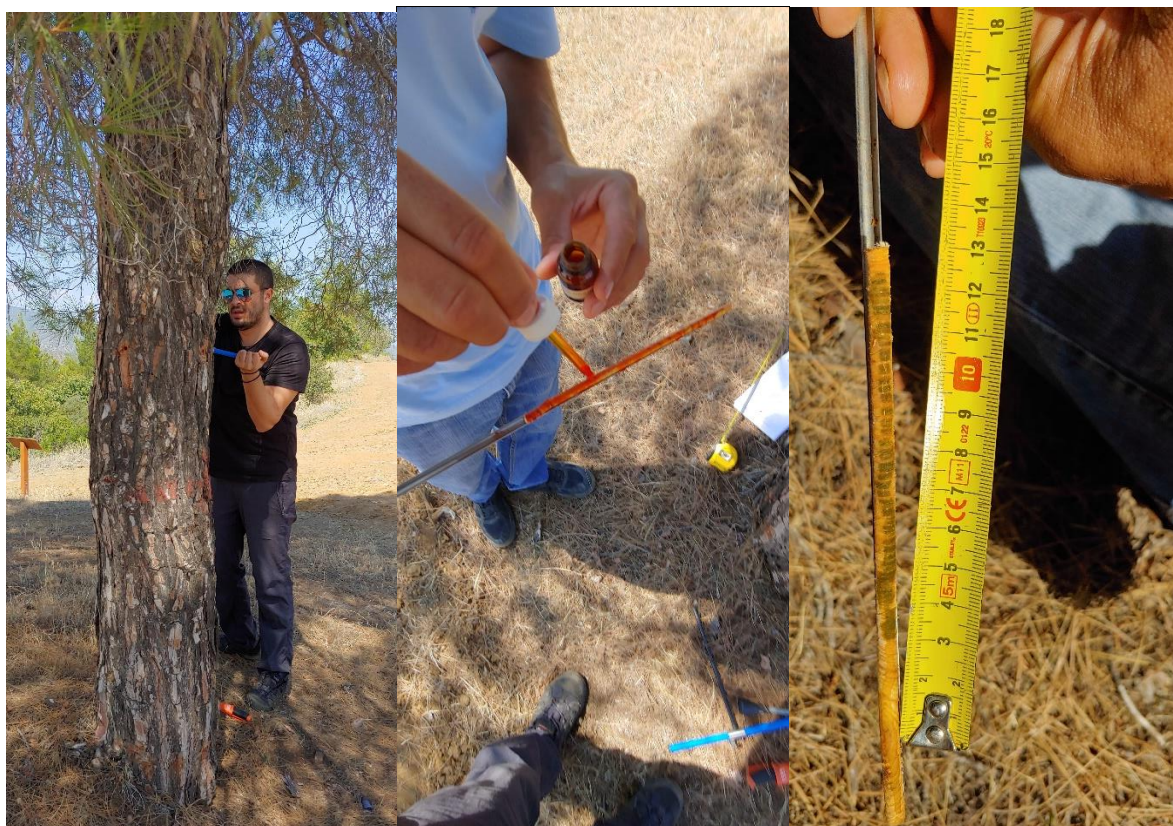

Figure S1. Sapwood determination procedure. Extraction of wood core samples were with an increment borer from four azimuths of the tree (left), application of color dye on the samples (center) and sapwood area determination based on the color difference (right).

Table S1. Sample of trees (N), tree circumference (Circum.), bark depth (bark), diameter (D), and north, south, east and west sapwood depths, all expressed in cm.

| N      | Circum. | Bark | D     | North dx | South dx | East dx | West dx | Variance |
|--------|---------|------|-------|----------|----------|---------|---------|----------|
| Tree 1 | 120     | 2.3  | 16.80 | 14.50    | 14.50    | 14.60   | 14.30   | 0.02     |
| Tree 2 | 109     | 2.5  | 14.85 | 11.85    | 12.10    | 12.05   | 11.95   | 0.01     |
| Tree 3 | 93      | 2    | 12.80 | 10.60    | 10.20    | 10.35   | 10.60   | 0.04     |

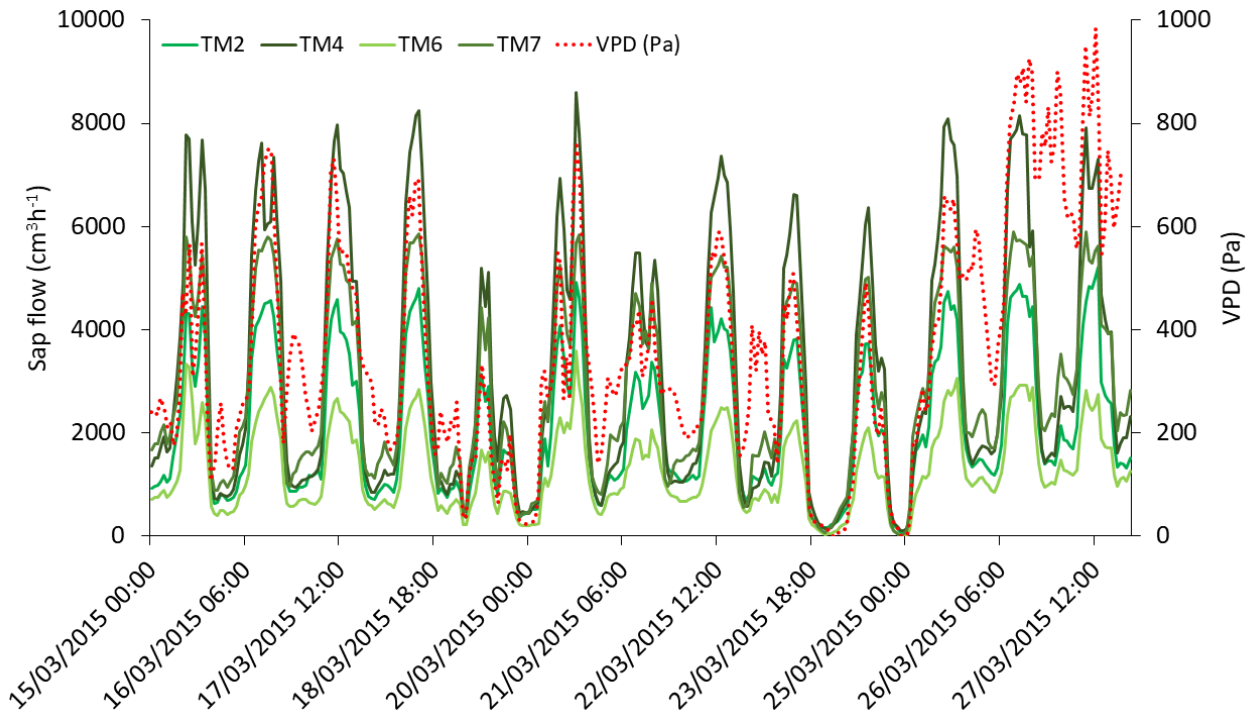

Figure S2. Example of the sapflow observations selected for zero flow determination (23/03/2015 and 25/03/2015) during periods of no biophysical driving force, i.e. near zero VPD and soil moisture above the field capacity ( $\theta > 20\%$ ) (data not shown).

Table S2. The fresh and dry weight, volume (V), basic density of freshwood (p), basic density of dry wood and the water content (mc) of sapwood for the selected *Pinus brutia* trees.

| Tree | Fresh weight (g) | Dry weight (g) | V (cm <sup>3</sup> ) | p (g/cm <sup>3</sup> ) | pb (g/cm <sup>3</sup> ) | mc   |
|------|------------------|----------------|----------------------|------------------------|-------------------------|------|
| 1    | 2.24             | 1.24           | 2.50                 | 0.90                   | 0.50                    | 0.81 |
| 2    | 2.17             | 1.41           | 2.67                 | 0.81                   | 0.53                    | 0.54 |
| 3    | 1.96             | 1.49           | 2.29                 | 0.86                   | 0.65                    | 0.32 |
| 4    | 2.49             | 1.58           | 3.02                 | 0.83                   | 0.52                    | 0.58 |
| 5    | 1.83             | 1.02           | 2.08                 | 0.88                   | 0.49                    | 0.80 |
| 6    | 3.29             | 2.04           | 3.33                 | 0.99                   | 0.61                    | 0.61 |
| 7    | 1.82             | 1.17           | 1.87                 | 0.97                   | 0.63                    | 0.55 |
| 8    | 1.82             | 1.17           | 1.85                 | 0.98                   | 0.63                    | 0.55 |
| 9    | 2.06             | 1.12           | 2.40                 | 0.86                   | 0.47                    | 0.84 |
| 10   | 1.86             | 1.03           | 2.04                 | 0.91                   | 0.50                    | 0.80 |

Table S3. Installation and reinstallation dates for each tree. Reinstallations were done either for excessive wounding or sensor failure- maintenance.

| Installations | TM1        | TM2        | TM3        | TM4        | TM5        | TM6        | TM7        | TM8        |
|---------------|------------|------------|------------|------------|------------|------------|------------|------------|
| 1             | 20/10/2015 | 26/12/2014 | 20/10/2015 | 10/12/2014 | 20/10/2015 | 17/11/2014 | 10/12/2014 | 20/10/2015 |
| 2             | 15/07/2016 | 20/07/2015 | 17/07/2017 | 24/02/2016 | 02/11/2016 | 20/07/2015 | 18/02/2016 | 02/11/2016 |
| 3             | 11/09/2017 | 31/05/2016 | 07/08/2017 | 11/08/2017 | 14/08/2017 | 28/02/2016 | 30/08/2016 | 14/08/2017 |
| 4             |            | 22/05/2017 |            | 02/11/2017 | 21/12/2017 | 10/07/2017 | 02/01/2017 | 09/10/2017 |

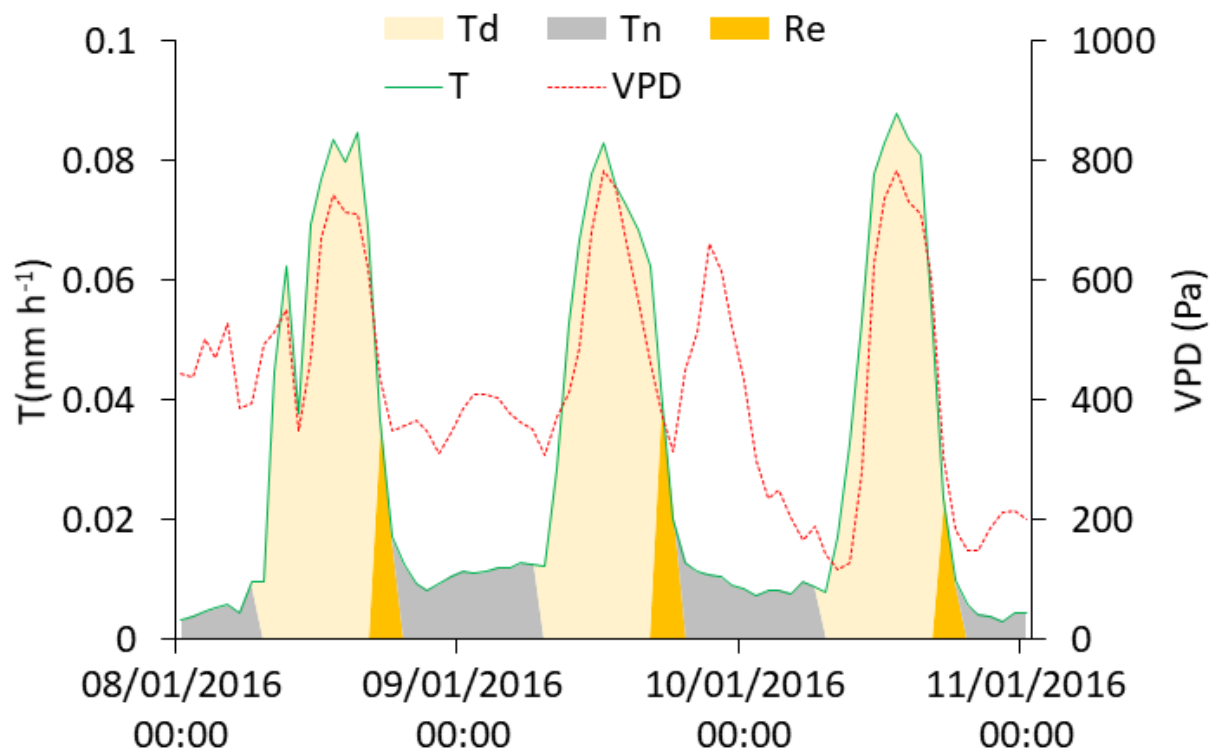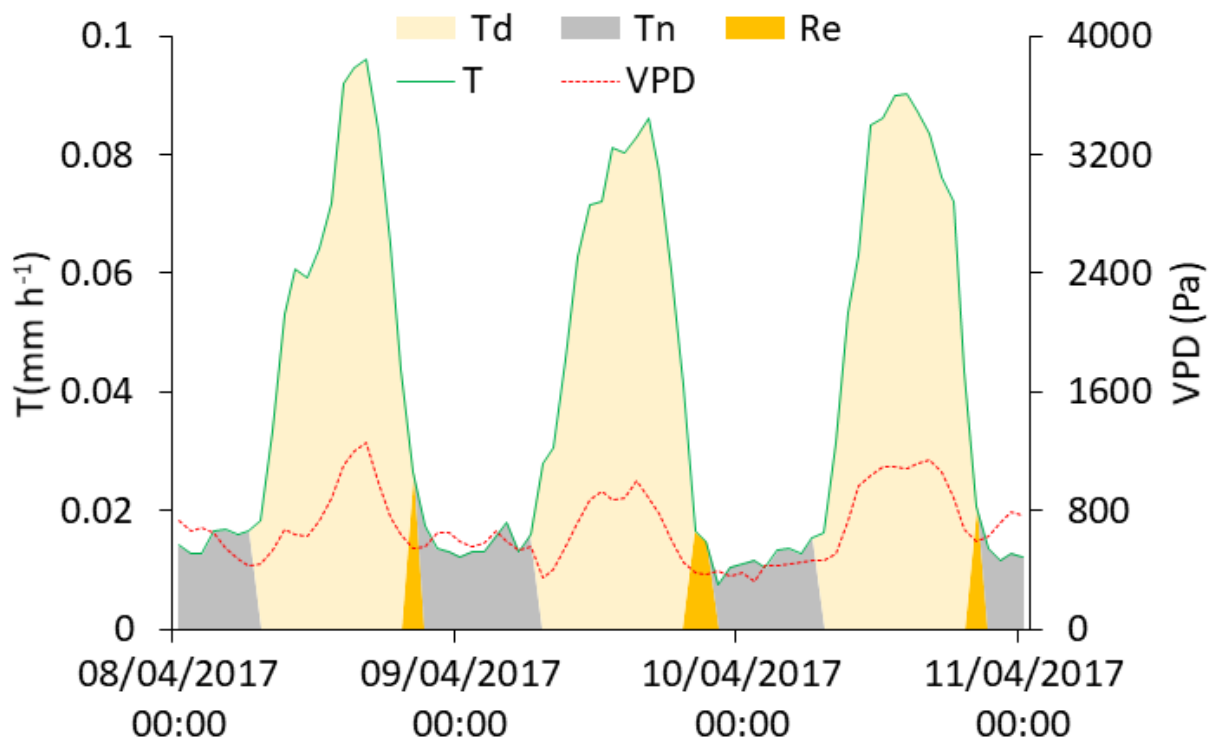

Figure S3. Transpiration (T) and VPD for selected periods (07/04/2015-10/04/2015, 08/01/2016-11/01/2016, 25/02/2015-28/02/2015). The light orange, orange and grey shaded areas show the daytime transpiration (Td), stem refilling (Re) and nocturnal transpiration (Tn), respectively.
